# Supplementary material for: Influence of codoped Gd3+ ions on the spectroscopic site symmetry of Dy3+ ions in LaF3 single crystals
Source: Royal Society of Chemistry journal article supplement (doi:10.1039/c9tc02951f), 2019-01-01
Supplement: c9tc02951f1.pdf [file c9tc02951f1.pdf]

**Influence of codoped Gd<sup>3+</sup> ions on spectroscopic site symmetry of Dy<sup>3+</sup> ions in LaF<sub>3</sub> single crystal**

**Mingyuan Hu,<sup>ab</sup> Yan Wang,<sup>a</sup> Zhenyu You,<sup>a</sup> Zhaojie Zhu,<sup>a</sup> Jianfu Li,<sup>a</sup> Xiuyuan Cai,<sup>ab</sup> and Chaoyang Tu<sup>\*a</sup>**

*<sup>a</sup>Key Laboratory of Optoelectronic Materials Chemistry and Physics, Fujian Institute of Research on the Structure of Matter, Chinese Academy of Sciences, Fuzhou City, Fujian Province 350002, P. R. China*

*<sup>b</sup>University of Chinese Academy of Science, Beijing, 100039, P. R. China*

## Theoretical studies

The structural optimization of pure and doped  $\text{LaF}_3$  crystal was performed by the BFGS geometry optimization method in the total-energy code castep of materials studio.<sup>1, 2</sup> The schematic representation of  $\text{LaF}_3$  crystals are shown in Figure S1. The initial structure of pure  $\text{LaF}_3$  was output from ICSD database (No. 3) as shown in Figure S1a.<sup>3</sup> First, the cell parameters of pure  $\text{LaF}_3$  were obtained in table S1,<sup>4</sup> and the final  $\text{LaF}_9$  polyhedron is shown in Figure S1d. Then, the starting structures of  $\text{Dy}^{3+}$  and  $\text{Gd}^{3+}$  doped  $\text{LaF}_3$  were built with the  $1 \times 1 \times 2$  supercell of optimized  $\text{LaF}_3$  structure, and one La was substituted by Dy and Gd, respectively (Figure S1b and S1c). The quality of geometry optimization was set as customized performed with the energy of  $2.0 \times 10^{-5}$  eV/atom, a convergence threshold of 0.05 eV/Å on the max force, 0.01 GPa on the max stress, and 0.002 Å on the max displacement. The electronic structures including band structure and density of state (DOS) calculations were performed by using a plane-wave basis set and pseudopotentials. The following valence electron configurations were considered in the computation: F- $2s^2 2p^5$ , La- $5s^2 5p^6 5d^1 6s^2$ , Gd- $4f^7 5s^2 5p^6 5d^1 6s^2$ , and Dy- $4f^{10} 5s^2 5p^6 6s^2$ . The exchange and correlation effects were treated by Perdew-Burke-Ernzerhof (PBE) in the generalized gradient approximation (GGA).<sup>5</sup> The interactions between the ionic cores and the valence electrons were described by the ultrasoft pseudopotential.<sup>6</sup> The number of plane waves included in the basis sets was determined by the cutoff energy of 550 eV, and the numerical integration of the Brillouin zone was performed by using Monkhorst-Pack k-point sampling of  $2 \times 2 \times 1$ . The final  $\text{DyF}_9$  and  $\text{GdF}_9$  polyhedrons are shown in Figure S1e and S1f, and the calculated electronic structures are in Figure 3S.

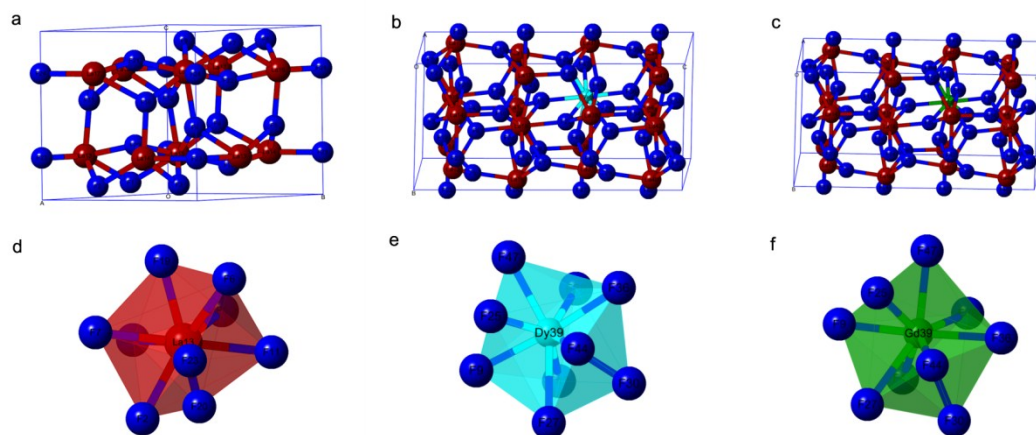

Figure S1. The initial crystal structure model for geometry optimization (a:  $\text{LaF}_3$ , b:  $\text{Dy:LaF}_3$ , c:  $\text{Gd:LaF}_3$ ), and the final  $\text{LaF}_9$ (d),  $\text{DyF}_9$ (e) and  $\text{GdF}_9$ (f) polyhedrons.

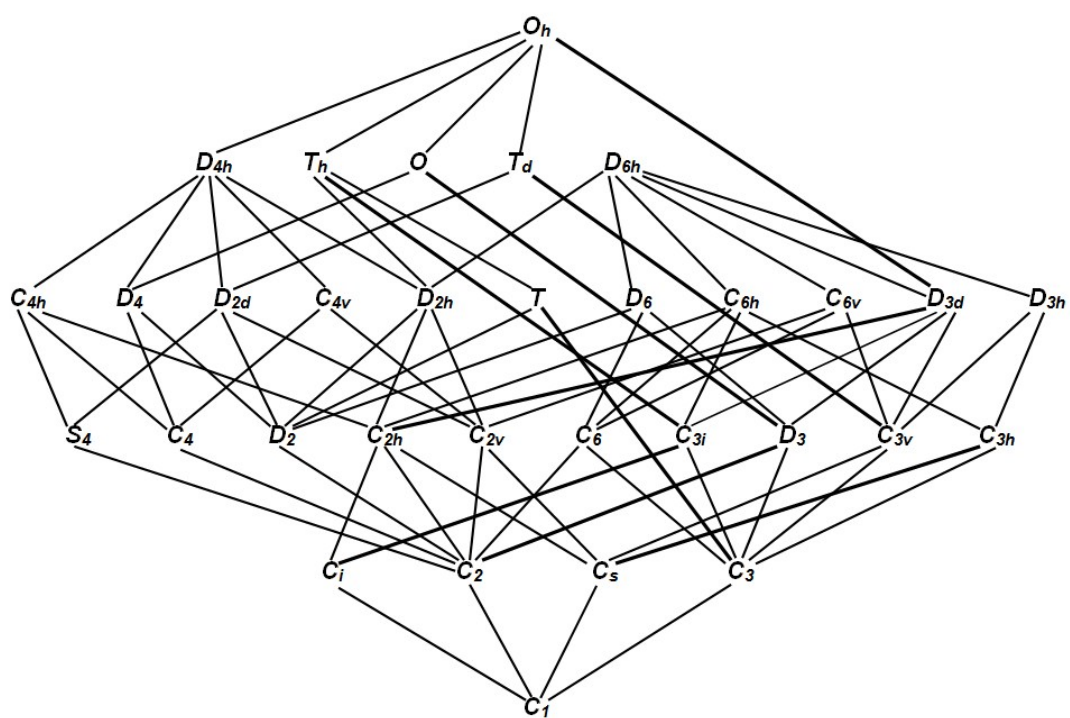

Figures S2. Branching rules of the 32 crystallographic point groups.<sup>7</sup>

Table S1. Positional parameters and site occupation factors (SOF) of optimized trigonal LaF<sub>3</sub> crystals.

| Phase                                            | Atom | Site | x/a     | y/b     | z/c     | SOF |
|--------------------------------------------------|------|------|---------|---------|---------|-----|
| Trigonal<br>( $P3C1$ )<br>a=b=7.322Å<br>c=7.501Å | La   | 6f   | 0.65728 | 0       | 0.25    | 1   |
|                                                  | F1   | 12g  | 0.37009 | 0.05951 | 0.08102 | 1   |
|                                                  | F2   | 4d   | 0.33333 | 0.66667 | 0.18509 | 1   |
|                                                  | F3   | 2a   | 0       | 0       | 0.25    | 1   |

Table S2. The bond length of La-F, Dy-F and Gd-F, which show the structural information of LaF<sub>9</sub>, DyF<sub>9</sub> and GdF<sub>9</sub> polyhedrons as shown in figure S1d, S1e and S1f.

| Bond     | Bond length (Å) | Bond     | Bond length (Å) | Bond     | Bond length (Å) |
|----------|-----------------|----------|-----------------|----------|-----------------|
| La13-F1  | 2.671           | Dy39-F9  | 2.336           | Gd39-F9  | 2.363           |
| La13-F2  | 2.522           | Dy39-F25 | 2.468           | Gd39-F25 | 2.406           |
| La13-F5  | 2.671           | Dy39-F27 | 2.612           | Gd39-F27 | 2.596           |
| La13-F6  | 2.522           | Dy39-F28 | 2.529           | Gd39-F28 | 2.493           |
| La13-F7  | 2.512           | Dy39-F30 | 2.668           | Gd39-F30 | 2.727           |
| La13-F11 | 2.512           | Dy39-F36 | 2.361           | Gd39-F36 | 2.436           |
| La13-F19 | 2.456           | Dy39-F43 | 2.327           | Gd39-F43 | 2.372           |
| La13-F20 | 2.456           | Dy39-F44 | 2.334           | Gd39-F44 | 2.376           |
| La13-F23 | 2.509           | Dy39-F47 | 2.430           | Gd39-F47 | 2.406           |

Table S3. The Interionic distance of La13-La, Dy39-La and Gd39-La.

|           | Interionic distance (Å) |           | Interionic distance (Å) |            | Interionic distance (Å) |
|-----------|-------------------------|-----------|-------------------------|------------|-------------------------|
| La13-La14 | 4.169                   | Dy39-La16 | 4.472                   | Gd39-La16  | 4.512                   |
| La13-La14 | 4.169                   | Dy39-La17 | 4.477                   | Gd39-La17  | 4.456                   |
| La13-La14 | 4.346                   | Dy39-La18 | 4.362                   | Gd 39-La18 | 4.374                   |
| La13-La15 | 4.169                   | Dy39-La37 | 4.517                   | Gd 39-La37 | 4.355                   |
| La13-La15 | 4.169                   | Dy39-La37 | 4.517                   | Gd 39-La37 | 4.133                   |
| La13-La15 | 4.346                   | Dy39-La37 | 4.376                   | Gd 39-La37 | 4.200                   |
| La13-La16 | 4.401                   | Dy39-La38 | 4.371                   | Gd 39-La38 | 4.354                   |
| La13-La16 | 4.401                   | Dy39-La38 | 4.171                   | Gd 39-La38 | 4.136                   |
| La13-La17 | 4.513                   | Dy39-La38 | 4.145                   | Gd 39-La38 | 4.196                   |
| La13-La17 | 4.513                   | Dy39-La40 | 4.377                   | Gd 39-La40 | 4.517                   |
| La13-La18 | 4.513                   | Dy39-La41 | 4.126                   | Gd 39-La41 | 4.510                   |
| La13-La18 | 4.513                   | Dy39-La42 | 4.185                   | Gd 39-La42 | 4.403                   |

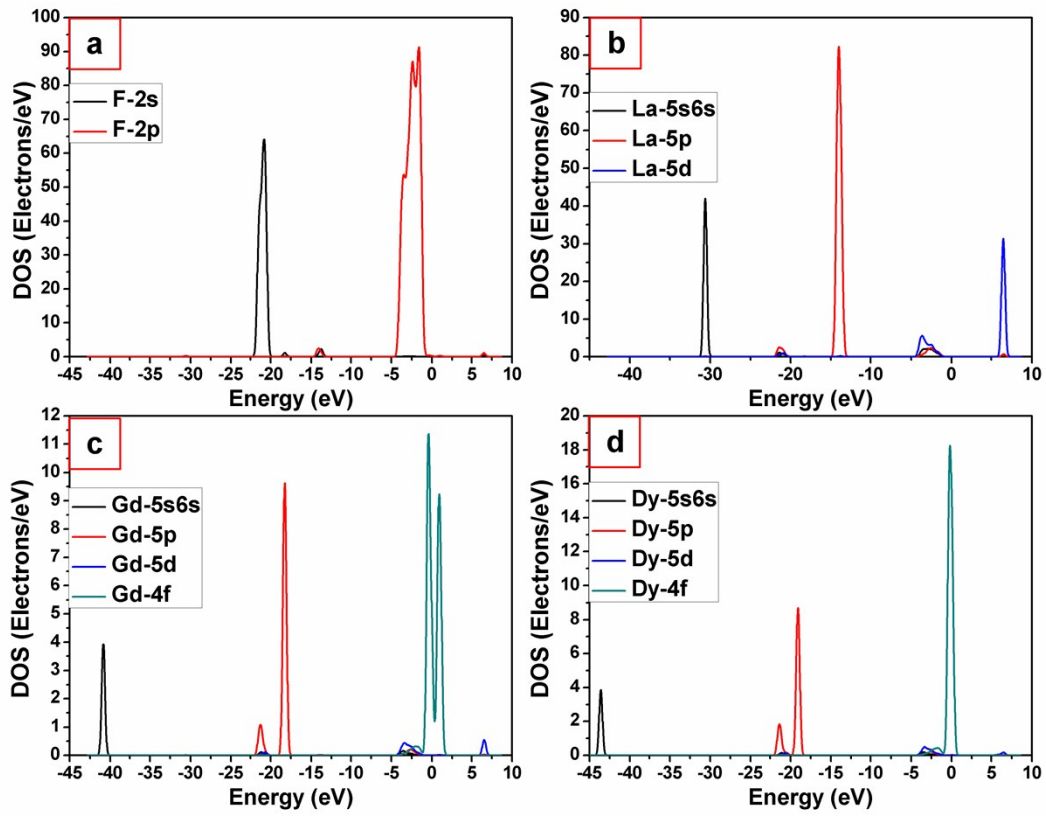

Figure S3. Calculated electronic DOS of the supercell of Dy/Gd:LaF<sub>3</sub>, (a) the partial DOS of F, (d) the partial DOS of La, (e) the partial DOS of Gd, (f) the partial DOS of Dy.

Table S4. The energy level of  ${}^6\text{H}_{15/2}$ ,  ${}^6\text{H}_{13/2}$ ,  ${}^4\text{F}_{7/2}$ , and  ${}^4\text{I}_{15/2}$  of  $\text{Dy}^{3+}$  in  $\text{LaF}_3$  at 77 K (Exp. = Experimental).

| SLJ State             | Energy ( $\text{cm}^{-1}$ ) |                  | SLJ State             | Energy ( $\text{cm}^{-1}$ ) |                  |
|-----------------------|-----------------------------|------------------|-----------------------|-----------------------------|------------------|
|                       | Exp.                        | Fit <sup>8</sup> |                       | Exp. <sup>a</sup>           | Fit <sup>8</sup> |
| ${}^6\text{H}_{15/2}$ |                             | 0                | ${}^4\text{F}_{9/2}$  | 21053                       | 21058            |
|                       |                             | 28               |                       | 21108                       | 21131            |
|                       |                             | 76               |                       | 21164                       | 21147            |
|                       |                             | 126              |                       | 21220                       | 21190            |
|                       |                             | 188              |                       | 21413                       | 21358            |
|                       |                             | 209              | ${}^4\text{I}_{15/2}$ | 21978                       | 22022            |
|                       |                             | 296              |                       | 22039                       | 22132            |
|                       |                             | 316              |                       | 22087                       | 22175            |
|                       |                             | 3502             |                       | 22148                       | 22189            |
| ${}^6\text{H}_{13/2}$ |                             | 3568             | 22222                 | 22213                       |                  |
|                       |                             | 3602             | 22297                 | 22292                       |                  |
|                       |                             | 3624             | 22346                 | 22342                       |                  |
|                       |                             | 3639             | 22384                 | 22379                       |                  |
|                       |                             | 3678             |                       |                             |                  |
|                       |                             | 3681             |                       |                             |                  |
|                       |                             |                  |                       |                             |                  |

<sup>a</sup>The experimental data were obtained from the excitation spectra.

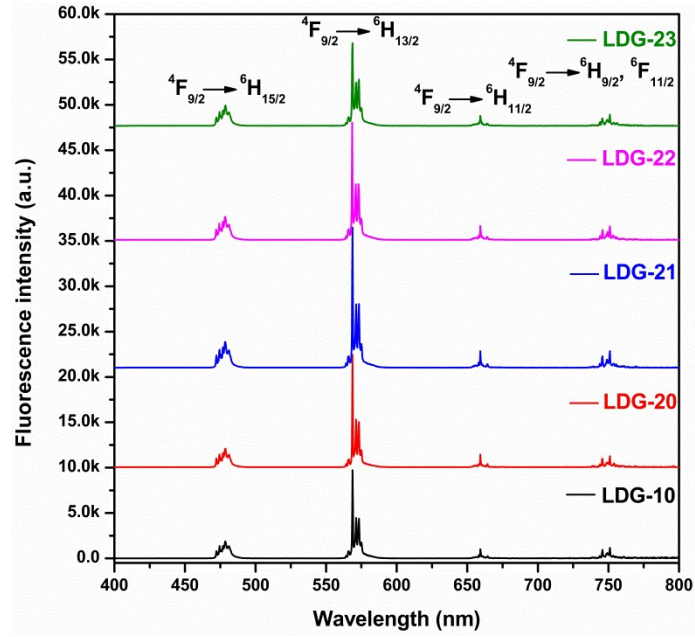

Figure S4. Visible emission spectra of Dy<sup>3+</sup>/Gd<sup>3+</sup> codoped LaF<sub>3</sub> single crystals pumped by 349 nm at 77 K.

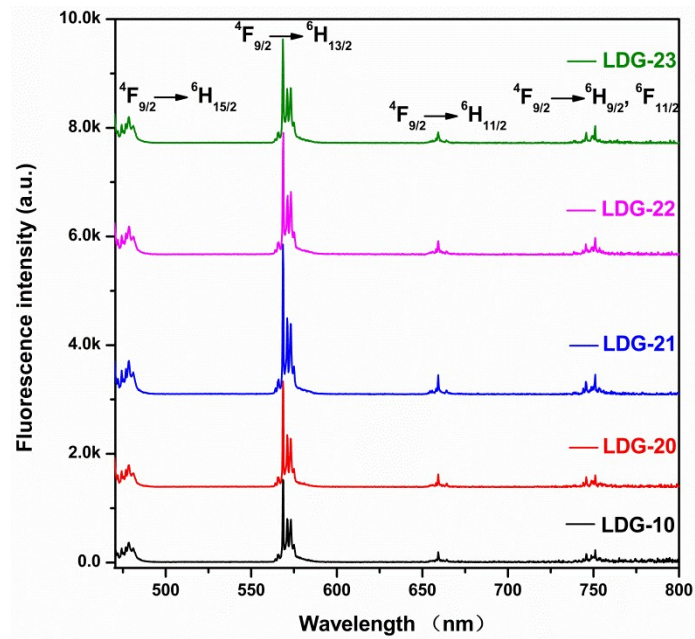

Figure S5. Visible emission spectra of Dy<sup>3+</sup>/Gd<sup>3+</sup> codoped LaF<sub>3</sub> single crystals pumped by 453.75 nm at 77 K.

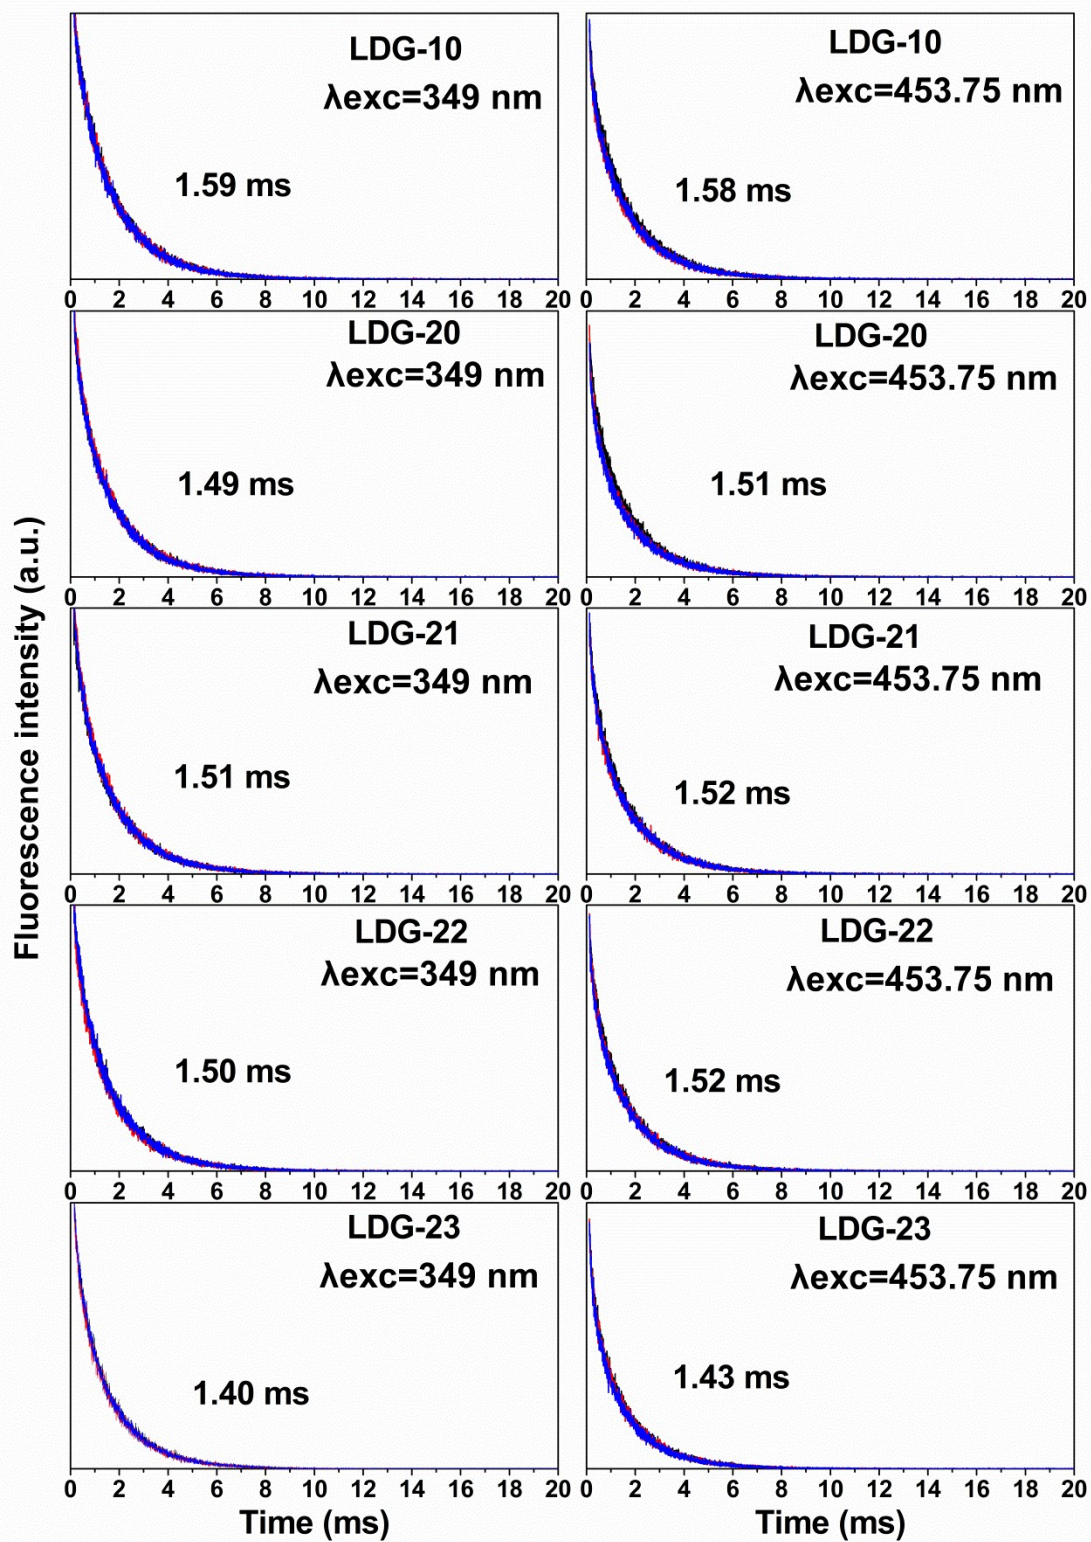

Figure S6. The yellow fluorescence decay curves of 568.75 nm, 571.25 nm, and 573.25 nm with the excitation of 349 nm and 453.75 nm in LDG crystals at 77 K.



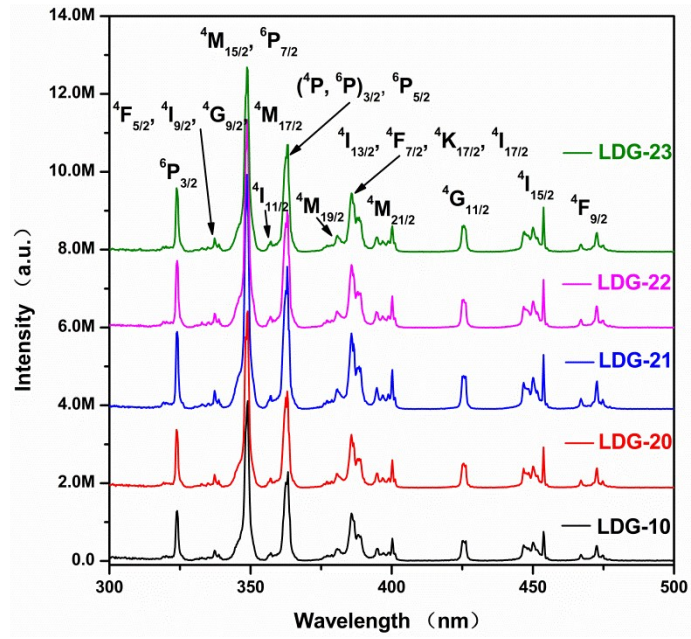

Figure S7. 77 K PL excitation ( $\lambda_{\text{em}}=568.75$  nm) spectra of  $\text{Dy}^{3+}/\text{Gd}^{3+}$  codoped  $\text{LaF}_3$  single crystals.

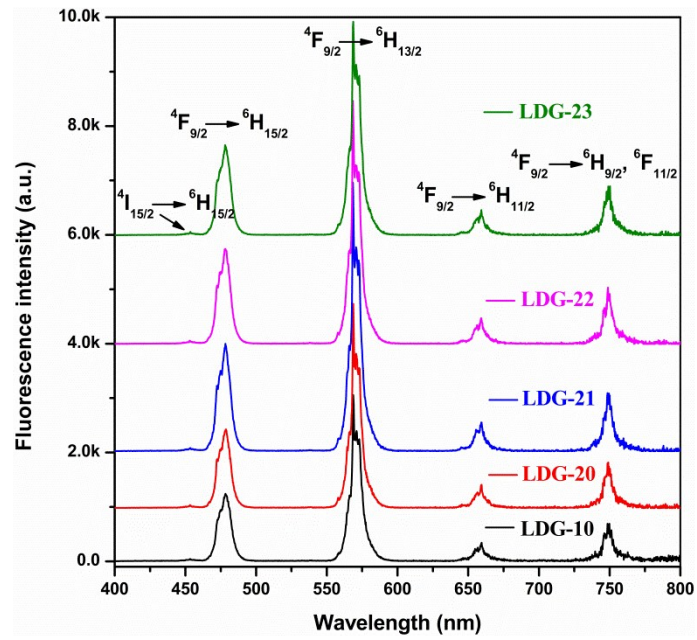

Figure S8. Visible emission spectra of Dy<sup>3+</sup>/Gd<sup>3+</sup> codoped LaF<sub>3</sub> single crystals pumped by 349 nm at 298 K.

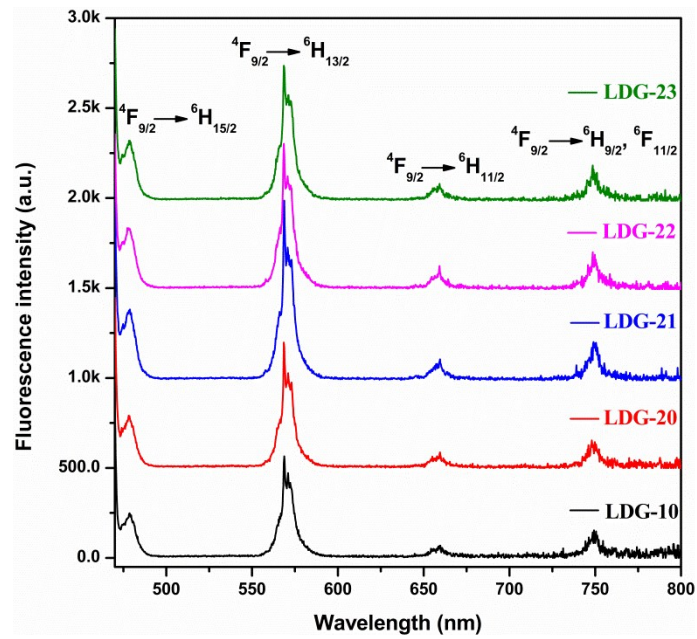

Figure S9. Visible emission spectra of Dy<sup>3+</sup>/Gd<sup>3+</sup> codoped LaF<sub>3</sub> single crystals pumped by 453.75 nm at 298 K.

## CIE Chromaticity Coordinates

The assessment and quantification of color is referred to as colorimetry or the ‘science of color’. The CIE 1931 diagram is the universally accepted system to represent the composition of any color by means of three primary colors. To describe the color produced by any light source, three color matching functions such as  $\bar{x}(\lambda)$ ,  $\bar{y}(\lambda)$ , and  $\bar{z}(\lambda)$  are essential. Artificial “colors”, denoted by X, Y and Z, also called tristimulus values, can be added to produce real spectral colors. The degree of simulation required to match the color of given power spectral density ( $P(\lambda)$ ) can be expressed as<sup>9</sup>

$$X = \int \bar{x}(\lambda)P(\lambda)d\lambda \quad (1)$$

$$Y = \int \bar{y}(\lambda)P(\lambda)d\lambda \quad (2)$$

$$Z = \int \bar{z}(\lambda)P(\lambda)d\lambda \quad (3)$$

where X, Y and Z are the tristimulus values which give the simulation for each three primary colors required to match the color of the given ( $P(\lambda)$ ). By using these tristimulus values, the chromaticity coordinates ( $x,y$ ) of the studied LDG crystals can be evaluated from the following expressions,

$$x = \frac{X}{X + Y + Z} \quad (4)$$

$$y = \frac{Y}{X + Y + Z} \quad (5)$$

The calculated chromaticity coordinate ( $x,y$ ) values are shown in Figure S10.

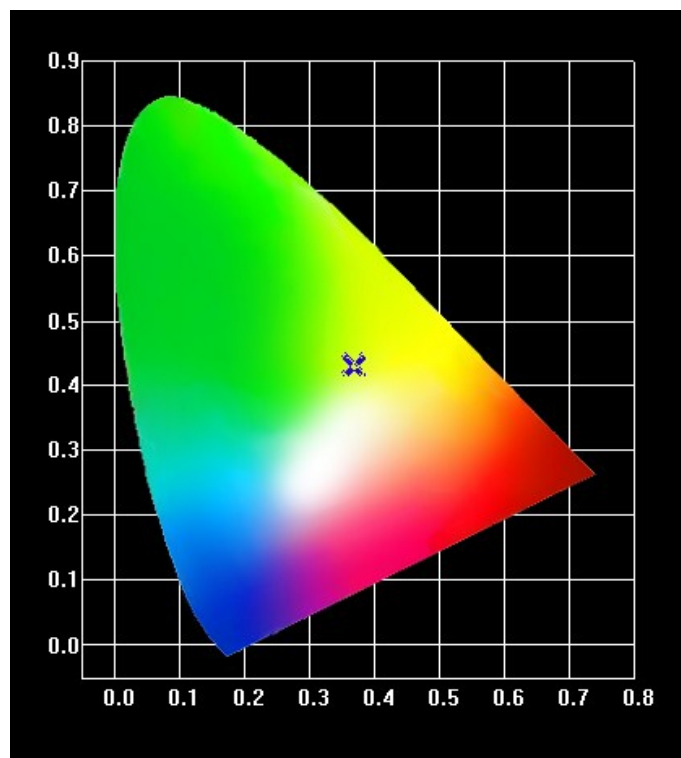

Figure S10. CIE-1931 chromaticity diagram of LDG crystals under 349 nm and 453.75 nm excitation at 298 K.

## Energy transfer mechanism

The critical transfer distance between  $\text{Dy}^{3+}$  ions ( $R_c$ ) for energy transfer was calculated using the critical concentration of the activator ions<sup>10</sup>

$$R_c \approx 2 \left( \frac{3V}{4\pi x_c Z} \right)^{\frac{1}{3}} \quad (6)$$

where  $V$  represents the volume of the unit cell,  $x_c$  stands for the critical concentration of the activator ion and  $Z$  refers to the number of formula units per unit cell. For  $\text{LaF}_3$  crystal,  $V=328.65 \text{ \AA}^3$ , and  $Z=6$ . The  $x_c$  are 0.01 and 0.02 in LDG-10 and LDG-20 respectively. The  $R_c$  are calculated to be about 21.87  $\text{\AA}$  and 17.36  $\text{\AA}$  in LDG-10 and LDG-20 respectively.

Based on Van Uitert's model,<sup>11</sup> the energy transfer mechanism between the activator ions can be confirmed by investigating the emission intensity ( $I$ ) per activator ion concentration ( $x$ ) in terms of the following equation

$$\frac{I}{x} = \frac{k}{I + \beta(x)^{\frac{\theta}{3}}}$$

(7)

where  $k$  and  $\beta$  are constants for the same excitation condition for the given host, and  $x$  is the activator concentration which is not less than the critical concentration. The above equation (7) can be rearranged for  $\beta(x)^{\theta/3} \gg 1$  as follows<sup>12</sup>

$$\lg \left( \frac{I}{x} \right) = K' - \frac{\theta}{3} \lg(x) \quad (8)$$

Where  $K' = \lg k - \lg \beta$  is a constant,  $\theta$  is the constant of multipolar interaction and is equal to 3,6,8,10 for the nearest neighbour ions ( $\theta=3$ ), dipole-dipole ( $\theta=6$ ), dipole-quadrupole ( $\theta=8$ ) and quadrupole-quadrupole ( $\theta=10$ ) interactions respectively. Using the yellow fluorescence emissions of LDG-10 and LDG-20 shown in Figure S8 and S9, the  $\theta$  was determined to be 2.1. So the nearest neighbour ions play a major role for concentration quenching in  $\text{Dy}^{3+}$  doped  $\text{LaF}_3$  crystals.

## References

- [1] B. G. Pfommer, M. Cote, S. G. Louie and M. L. Cohen, *J. Comput. Phys.*, 1997, 131, 233-240.
- [2] S. J. Clark, M. D. Segall, C. J. Pickard, P. J. Hasnip, M. J. Probert, K. Refson and M. C. Payne, *Zeitschrift für Kristallographie-Crystalline Materials*, 2005, 220, 567-570.
- [3] A. K. Cheetham, B. E. F. Fender, H. Fuess and A. F. Wright, *Acta Crystallogra. B*, 1976, 32, 94-97.
- [4] M. Hu, Z. Zhu, Y. Wang, J. Li, Z. You and C. Tu, *Cryst. Growth Des.*, 2018, 18, 5981-5990.
- [5] J. P. Perdew, K. Burke, M. Ernzerhof, *Phys. Rev. Lett.*, 1996, 77, 3865-3868.

- [6] N. Troullier, J. L. Martins, *Phys. Rev. B*, 1991, 43, 1993-2006.
- [7] P. H. Butler, *Point Group Symmetry Application: Method and Tables*, Plenum, New York, 1981.
- [8] W. T. Carnall, G. L. Goodman, K. Rajnak, R. S. Rana, *J. Chem. Phys.*, 1989, 90, 3443-3457.
- [9] P. Suthanthirakumar and K. Marimuthu, *J. Mol. Struct.*, 2016, 1125, 443-452.
- [10] Z. Xiu, S. Liu, M. Ren, J. Liu, J. Pan and X. Cui, *J. Alloy. Compd.*, 2006, 425, 261-263.
- [11] D. L. Dexter, *J. Chem. Phys.*, 1953, 21, 836-850.
- [12] M. Jayachandiran and S. M. M. Kennedy, *J. Alloy. Compd.*, 2019, 775, 353-359.
